# Supplementary material for: Myeloid p38α signaling promotes intestinal IGF‐1 production and inflammation‐associated tumorigenesis
Source: PubMed Central journal article supplement (PMC6034132; doi:10.15252/emmm.201708403), 2018-06-15
Supplement: EMMM-10-e8403-s002.pdf [file EMMM-10-e8403-s002.pdf]

## Expanded View Figures

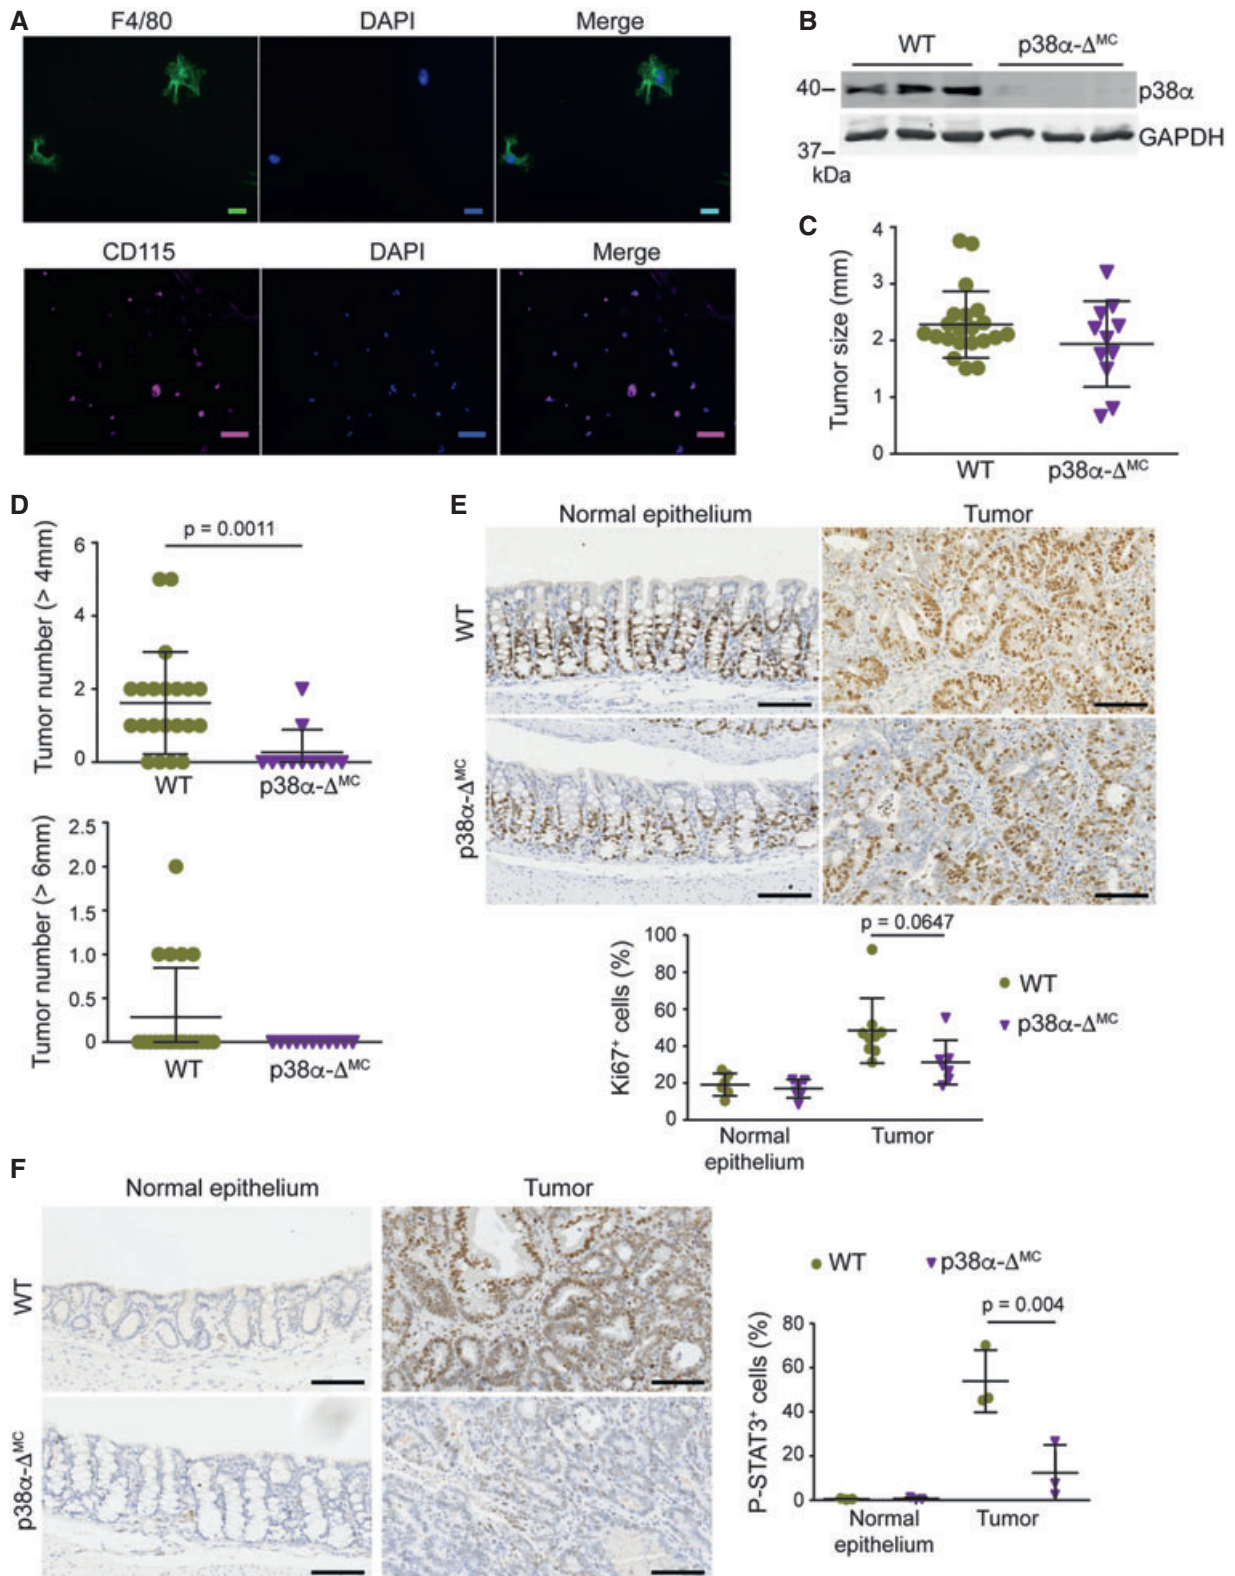

Figure EV1.

**Figure EV1. Downregulation of p38 $\alpha$  in myeloid cells reduces inflammation in the tumor microenvironment.**

- A Representative images of intestinal macrophages isolated from the colonic lamina propria and stained for F4/80 and CD115. Scale bars, 10  $\mu$ m (F4/80) and 100  $\mu$ m (CD115).
- B Representative immunoblots of p38 $\alpha$  in lysates from peritoneal macrophages.
- C Average tumor size ( $n \geq 11$ ).
- D Number of tumors > 4 and >6 mm in AOM/DSS-treated mice ( $n \geq 11$ ).
- E, F Representative sections from normal colon epithelia and colon tumors stained for Ki67 ( $n \geq 6$ ) (E) and phospho-STAT3 ( $n \geq 3$ ) (F). Quantifications are shown in the histogram. Scale bars, 100  $\mu$ m.

Data information: Statistical analysis was performed by using Mann–Whitney test for the comparison of two groups or ANOVA using Bonferroni *post hoc* correction for multiple groups. Data are expressed as the average  $\pm$  SD.

**Figure EV2. Mice with p38 $\alpha$ -deficient myeloid cells show reduced DSS-induced colitis and decreased leukocyte recruitment during intestinal inflammation.**

- A Representative images of H&E-stained colon sections from animals either untreated or treated with DSS for 6 days and analyzed at the indicated days. Scale bars, 100  $\mu$ m.
- B–D Representative colon sections stained for CD45 (B), MPO (C), and CD3 (D) from untreated mice or mice treated with DSS for 6 days and analyzed at day 7 ( $n \geq 5$ ). Quantifications are shown in the histogram. Scale bars, 100  $\mu$ m.

Data information: Statistical analysis was performed by ANOVA using Bonferroni *post hoc* correction. Data are expressed as the average  $\pm$  SD.

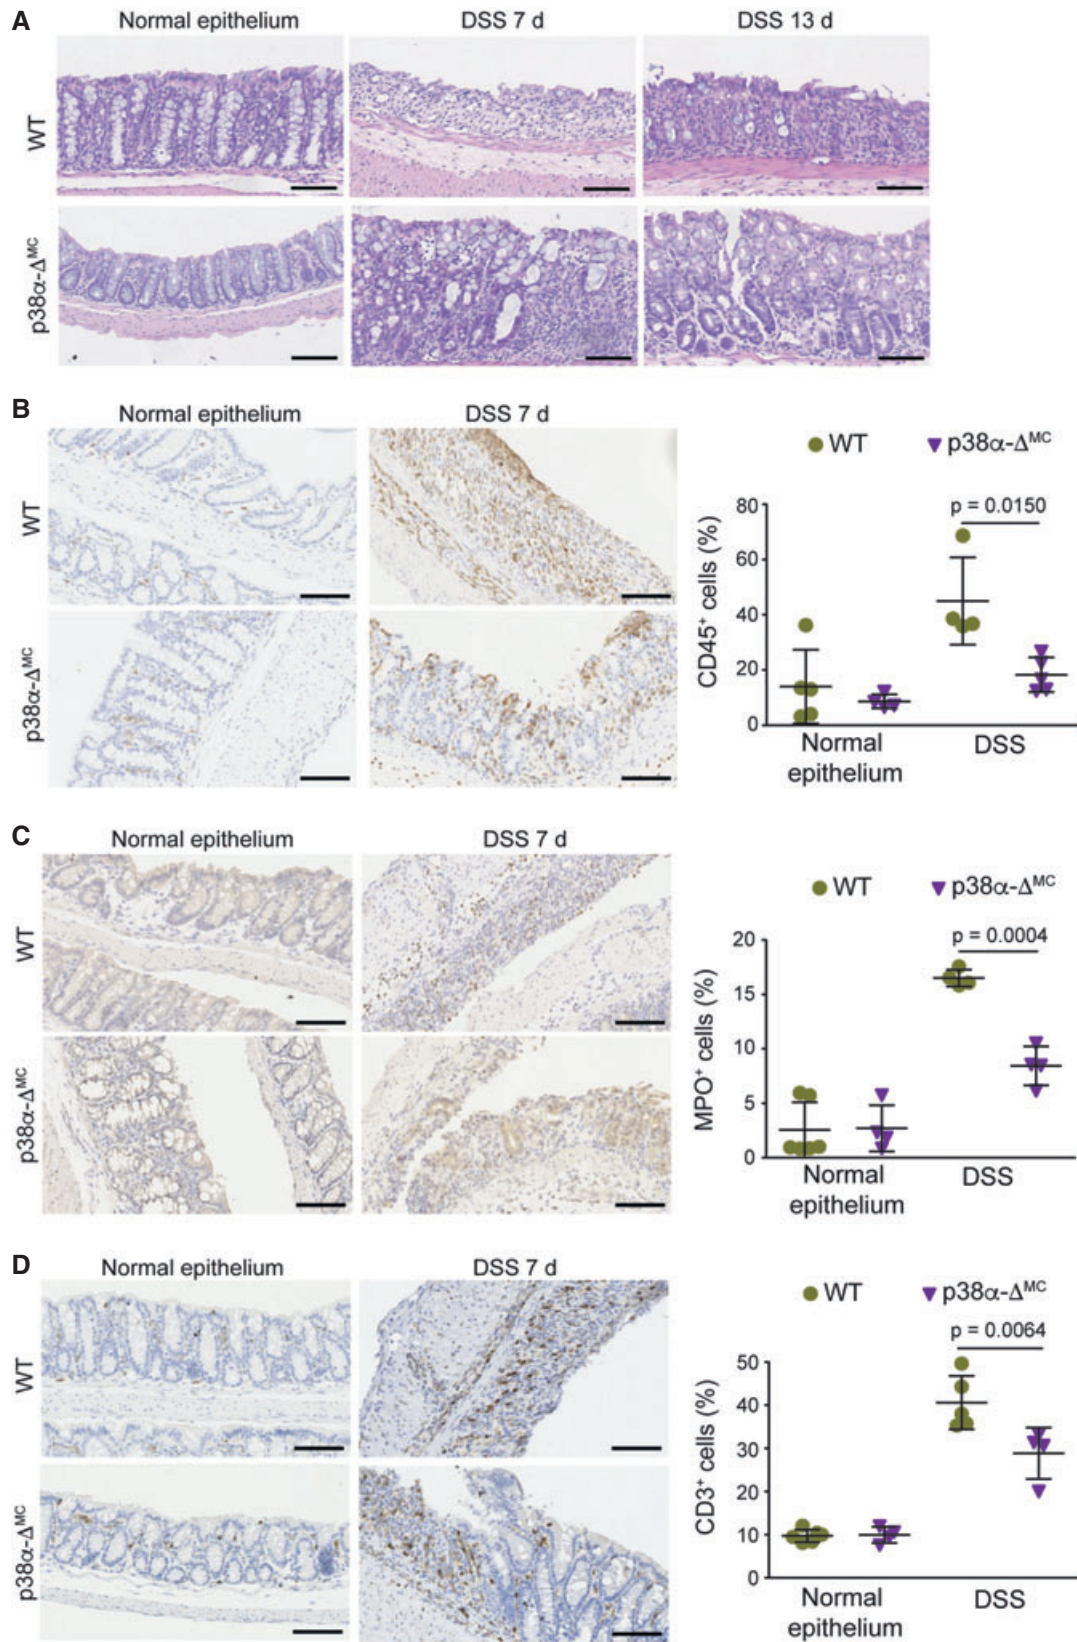

Figure EV2.

**Figure EV3. Downregulation of IGF-1 in myeloid cells reduces susceptibility to intestinal inflammation.**

- A Relative IGF-1 mRNA levels in peritoneal macrophages ( $n \geq 8$ ).
- B, C Body weight (B) and disease activity index (C) were recorded daily during DSS-induced colitis ( $n \geq 31$ ). This is a pool from three experiments, which are shown individually in Appendix Fig S3C.
- D Representative images of H&E-stained sections from mice either untreated or treated with DSS for 6 days and analyzed at the indicated days. Scale bars, 100  $\mu$ m
- E, F Representative colon sections stained for phospho-STAT3 (E) or phospho-IGF1R (F) from mice treated with DSS for 6 days and analyzed at the indicated days. Quantifications are shown in the histograms ( $n \geq 7$ ). Scale bars, 100  $\mu$ m.

Data information: Statistical analysis was performed by using Mann–Whitney test for the comparison of two groups or ANOVA using Bonferroni *post hoc* correction for multiple groups. Data are expressed as the average  $\pm$  SD.

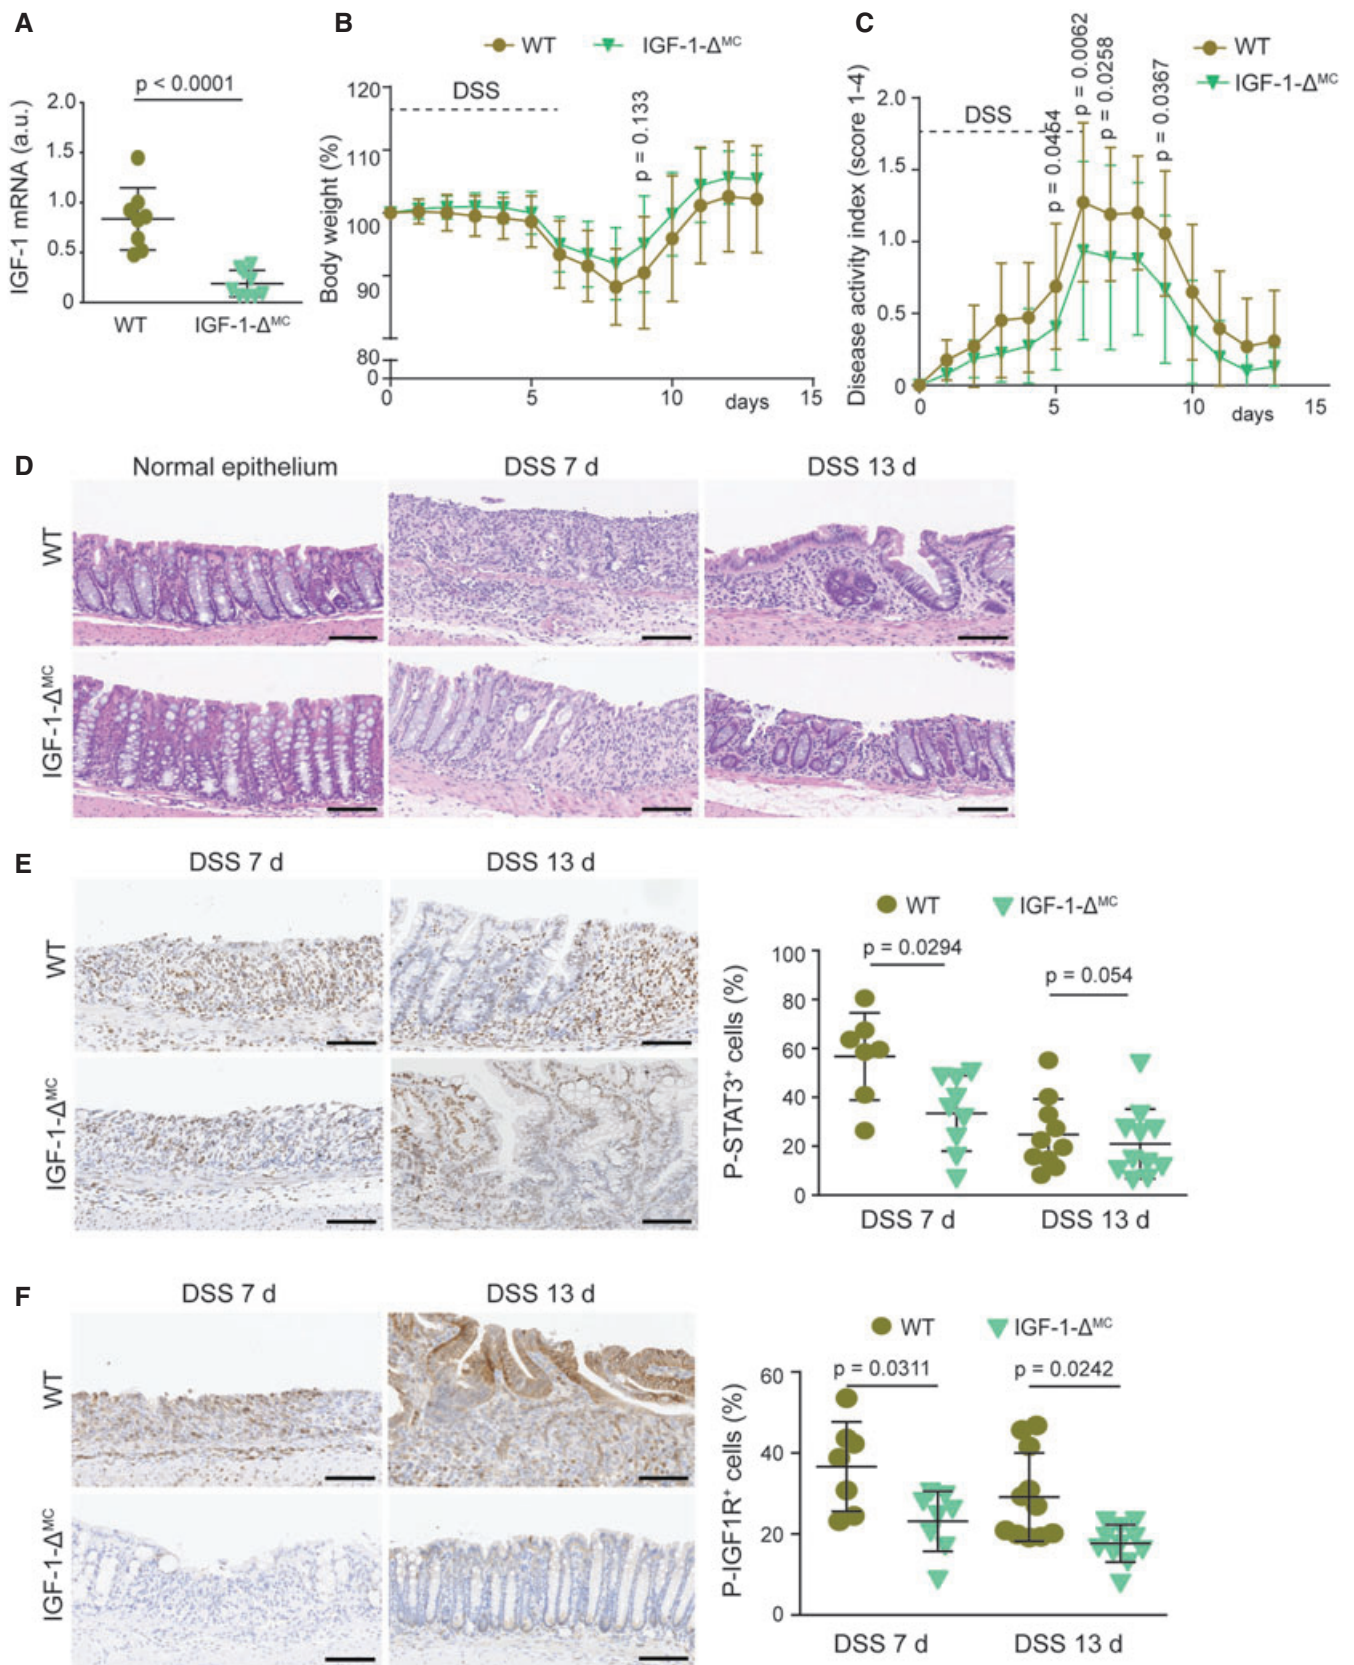

Figure EV3.

**Figure EV4. Myeloid p38 $\alpha$  downregulation reduces chemokine expression and inflammatory cell recruitment from the bone marrow.**

- A Percentage of Ly6C<sup>hi</sup> and CCR2<sup>+</sup> in bone marrow cells that were alive and CD45<sup>+</sup> CD11b<sup>+</sup> from untreated WT and p38 $\alpha$ - $\Delta^{\text{MC}}$  mice ( $n = 11$ ).
- B Percentage of Ly6C<sup>hi</sup> and CCR2<sup>+</sup> in bone marrow cells that were alive and CD45<sup>+</sup> CD11b<sup>+</sup> from untreated WT and IGF-1- $\Delta^{\text{MC}}$  mice ( $n \geq 5$ ).
- C A mouse chemokine antibody array was interrogated using pools of whole colon extracts derived from non-stimulated mice either WT or p38 $\alpha$ - $\Delta^{\text{MC}}$  ( $n = 5$ /genotype). Quantifications are shown in the lower panel. Arbitrary units (a.u.) are referred to the expression level of each chemokine in WT mice, which was given the value of 1.
- D Percentage of CD45<sup>+</sup> CD11b<sup>+</sup> cells in the live cell population from colons of untreated WT and p38 $\alpha$ - $\Delta^{\text{MC}}$  mice ( $n = 8$ ).
- E The indicated cell populations were sorted from the bone marrow of mice, and genomic DNA was analyzed by qPCR for the levels of floxed exon 2 versus exon 12 (as a control) of the *Mapk14* gene encoding p38 $\alpha$  ( $n \geq 5$ ).
- F Representative bone marrow sections stained for phospho-IGF1R from untreated mice. Scale bars, 100  $\mu\text{m}$ .
- G Bone marrow sections from untreated mice ( $n \geq 9$ ) were stained for phospho-IGF1R. The histograms show the quantification of all cells that were stained for phospho-IGF1R<sup>+</sup> (left panel) or only cells that show moderate (2<sup>+</sup>) and high (3<sup>+</sup>) intensities (right panel).

Data information: Statistical analysis was performed by using Mann–Whitney test for the comparison of two groups or ANOVA using Bonferroni *post hoc* correction for multiple groups. Data are expressed as the average  $\pm$  SD.

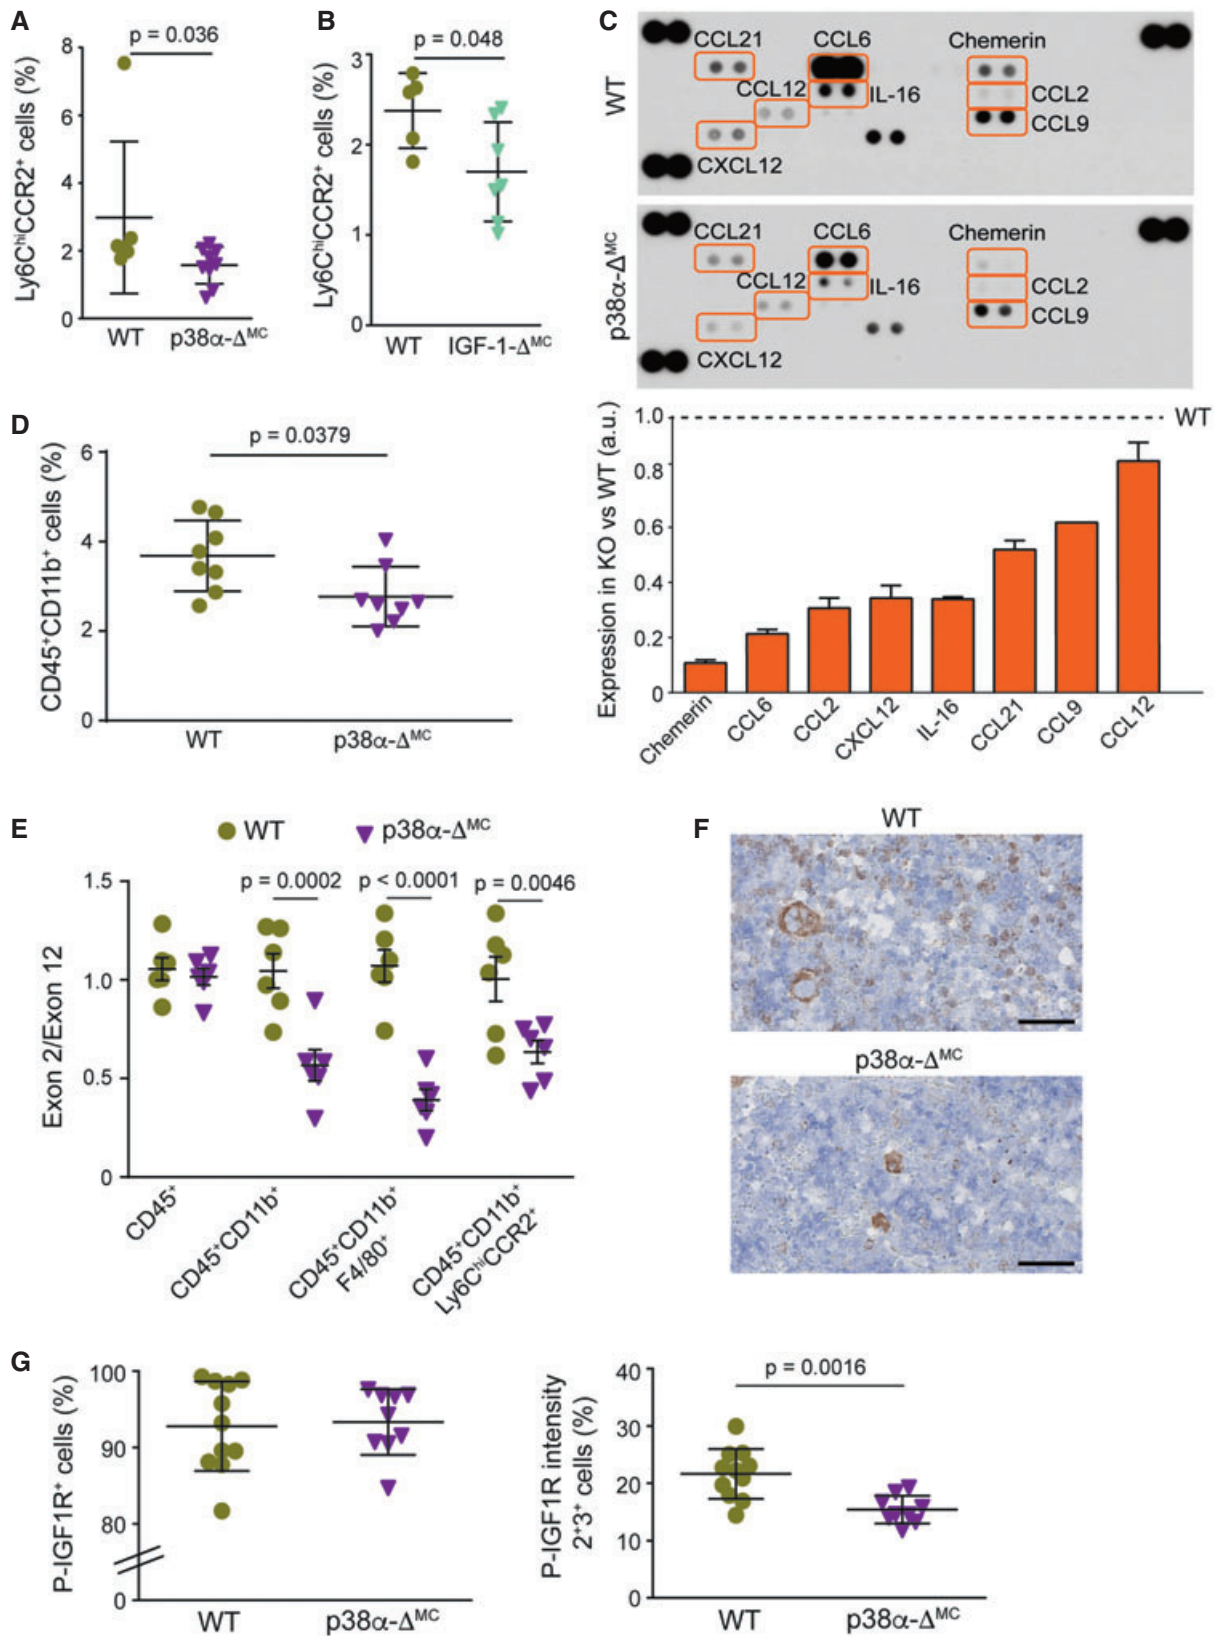

Figure EV4.

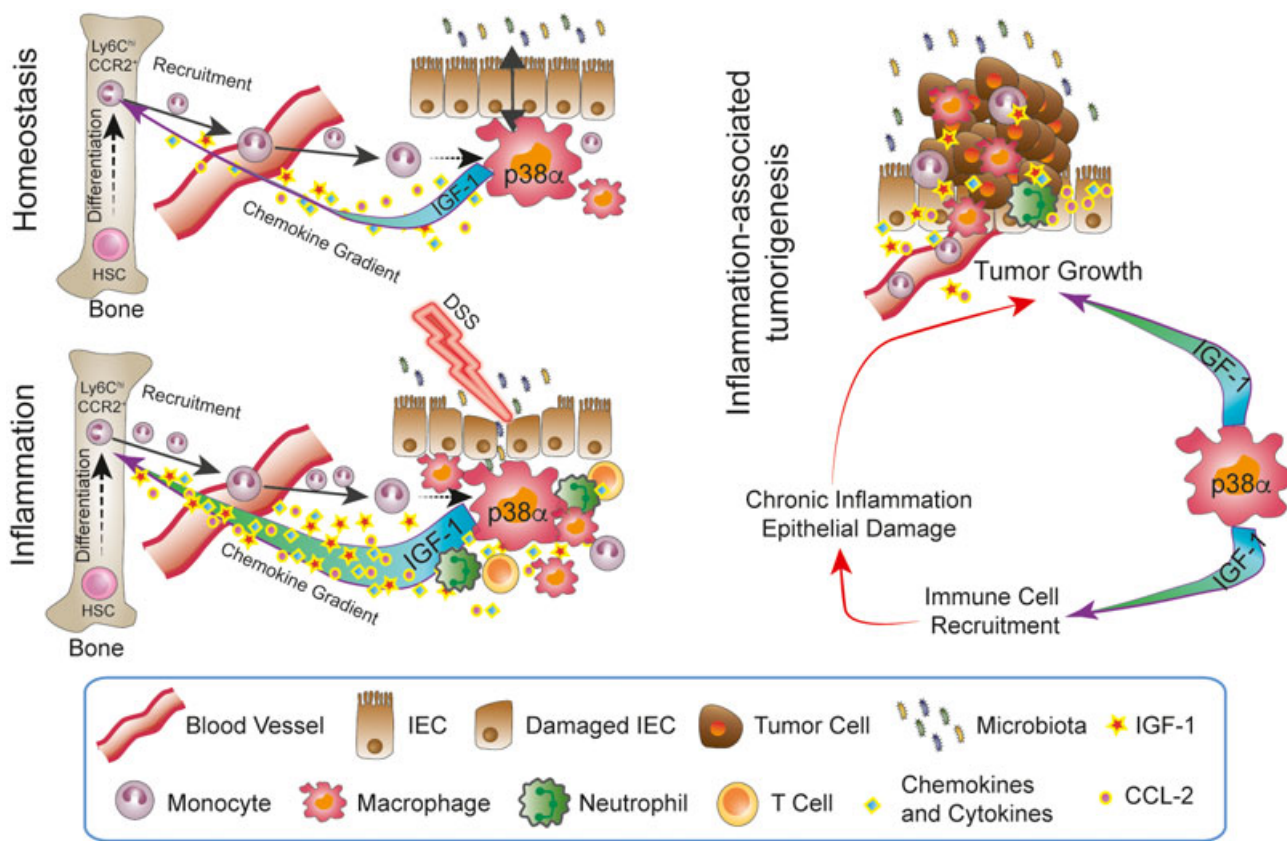

**Figure EV5. The myeloid p38 $\alpha$ -IGF-1 axis in the intestine under healthy and pathological conditions.**

Commensal microbiota lead to a situation of tightly controlled inflammation, which involves constant recruitment of monocytes from hematopoietic stem cells (HSCs) in the bone marrow to the intestine. Intestinal macrophages rely on p38 $\alpha$  to control the expression of IGF-1 and chemokines that are important for this process. Under pathological conditions that increase intestinal inflammation, immune cell recruitment is boosted and a vicious cycle may start that leads to the development of chronic inflammation and eventually, in certain cases, to the formation of tumors. IGF-1 produced by myeloid cells may also facilitate tumorigenesis by acting directly on tumor cells.
